# Supplementary material for: Antibacterial and Anti-Quorum Sensing Molecular Composition Derived from Quercus cortex (Oak bark) Extract
Source: MDPI journal article supplement (doi:10.3390/molecules200917093), 2015-09-18
Supplement: s1 [file s1]

## Supplementary Materials

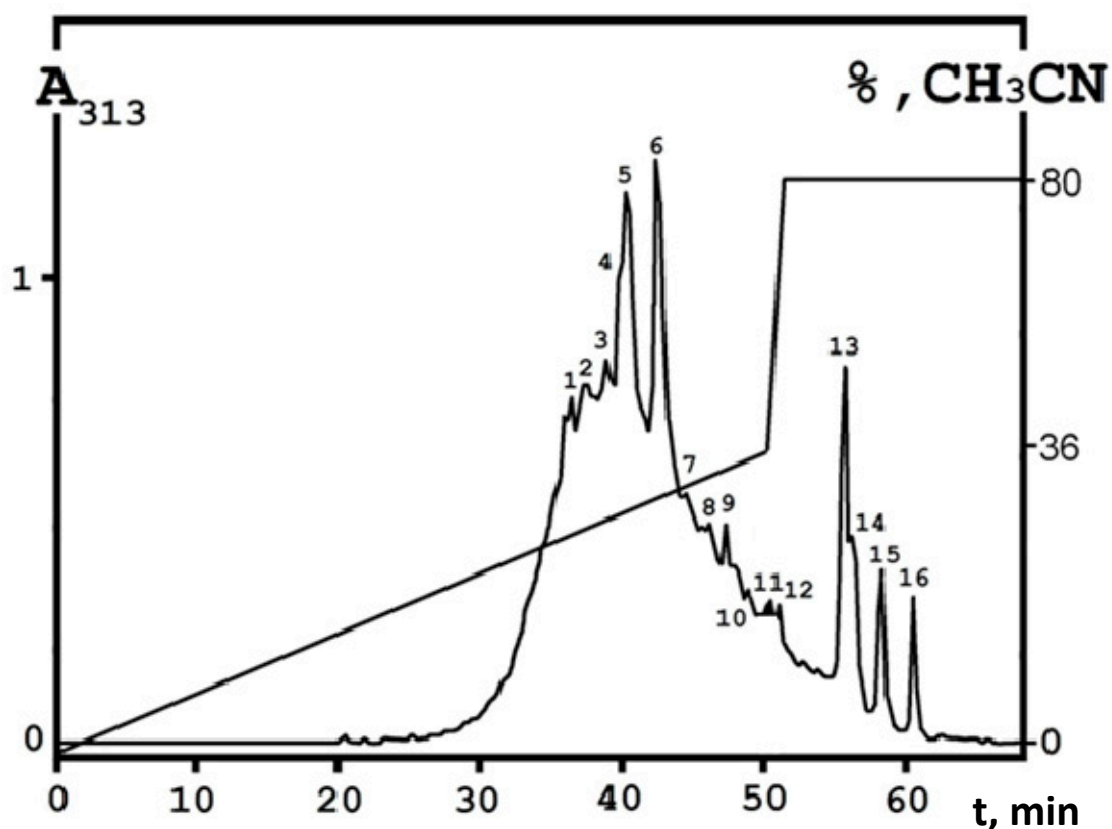

**Figure S1.** RP-HPLC chromatogram of the *Q. cortex* extract (“C” sample) obtained with Luna C<sub>18</sub> column (Phenomenex, Torrance, CA, USA). Abscissa axis—retention time, min; ordinate axis—absorbance (A) at 313 nm. The acetonitrile (CH<sub>3</sub>CN) concentration in the mobile phase presented as a linear gradient. Fractions 1–16 were collected, lyophilized and tested for antibacterial and anti-QS activity.
